# Supplementary material
Source: PubMed Central journal article supplement (PMC3699746)
Supplement: mmc1.pdf [file mmc1.pdf]

Supporting Material

**A ribokinase family conserved monovalent cation binding site  
enhances the MgATP-induced inhibition in *E. coli* phosphofructokinase-2**

Mauricio Baez<sup>†</sup>, Ricardo Cabrera<sup>‡</sup>, Humberto M. Pereira<sup>§</sup>, Alejandro Blanco<sup>‡</sup>, Pablo Villalobos<sup>‡</sup>,  
César A. Ramírez-Sarmiento<sup>‡</sup>, Andrés Caniuguir<sup>‡</sup>, Victoria Guixé<sup>‡</sup>, Richard C. Garratt<sup>§</sup>, and  
Jorge Babul<sup>‡\*</sup>.

<sup>†</sup>Departamento de Bioquímica y Biología Molecular, Facultad de Ciencias Químicas y  
Farmacéuticas, Universidad de Chile, Santiago, Chile

<sup>‡</sup>Departamento de Biología, Facultad de Ciencias, Universidad de Chile, Santiago, Chile

<sup>§</sup>Centro de Biotecnología Molecular Estrutural, Instituto de Física de São Carlos, Universidade  
de São Paulo, São Paulo, Brazil.

**Table 1** Full data collection and refinement statistics

| Full data collection and refinement statistics | PFK2 KCl                  | PFK2 CsCl                 |
|------------------------------------------------|---------------------------|---------------------------|
| <b>Data Collection</b>                         |                           |                           |
| Space group                                    | P222 <sub>1</sub>         | P222 <sub>1</sub>         |
| Cell dimensions (Å) a, b, c.                   | 43.81, 88.84, 176.13      | 43.86, 88.91, 176.41      |
| Detector                                       | PILATUS 6M                | PILATUS 6M                |
| X-ray source                                   | ESRF ID29                 | ESRF ID29                 |
| Wavelength (Å)                                 | 0.976                     | 0.976                     |
| Resolution range (Å)                           | 50.0 – 1.70 (1.80 – 1.70) | 50.0 – 1.85 (1.96 – 1.85) |
| Redundancy                                     | 4.33 (4.42)               | 2.42 (2.39)               |
| Rmeans (%)*                                    | 5.8 (66.8)                | 6.7 (58.5)                |
| Completeness(%)                                | 98.8 (98.1)               | 96.4 (96.2)               |
| Total reflections                              | 330515 (53412)            | 267935 (42414)            |
| Unique reflections                             | 76204 (12301)             | 109841 (17693)            |
| I / σ(I)                                       | 15.06 (2.04)              | 10.48 (2.07)              |
| <b>Refinement parameters</b>                   |                           |                           |
| Reflections used for refinement                | 76250                     | 109841                    |
| R (%)**                                        | 18.30                     | 17.40                     |
| R <sub>Free</sub> (%)**                        | 20.80                     | 20.90                     |
| Overall averaged B-factor (Å <sup>2</sup> )    | 25.50                     | 29.03                     |
| Ligand averaged B-factor(Å <sup>2</sup> )      | 25.64                     | 33.27                     |
| No. of protein atoms                           | 4560                      | 4558                      |
| No. of water molecules                         | 604                       | 544                       |
| No. of ligand atoms                            | 192                       | 141                       |
| <b>Ramachandran Plot</b>                       |                           |                           |
| Favoured region (%)                            | 99.19                     | 99.18                     |
| Residues in disallowed regions (%)             | 0.00                      | 0.00                      |
| <b>RMSD from ideal geometry</b>                |                           |                           |
| r.m.s. bond lengths (Å)                        | 0.007                     | 0.007                     |
| r.m.s. bond angles (°)                         | 1.157                     | 1.144                     |

The numbers in parentheses are from the highest resolution shell .

\*  $R_{merge} = \frac{\sum_i \sum_j |I_i(hkl) - \langle I(hkl) \rangle|}{\sum_i \sum_j I_i(hkl)}$ , where  $I_i(hkl)$  is the observed intensity of measured reflection, and  $\langle I(hkl) \rangle$  is the averaged intensity over equivalent reflections from different measurements.

\*\*R is conventional crystallographic R factor,  $\frac{\sum ||F_{obs}| - |F_{calc}||}{\sum |F_{obs}|}$ , where  $F_{obs}$  and  $F_{calc}$  are the observed and calculated structure factors, respectively. Five percent of the reflections that were excluded from the refinement were used in the  $R_{free}$  calculation.

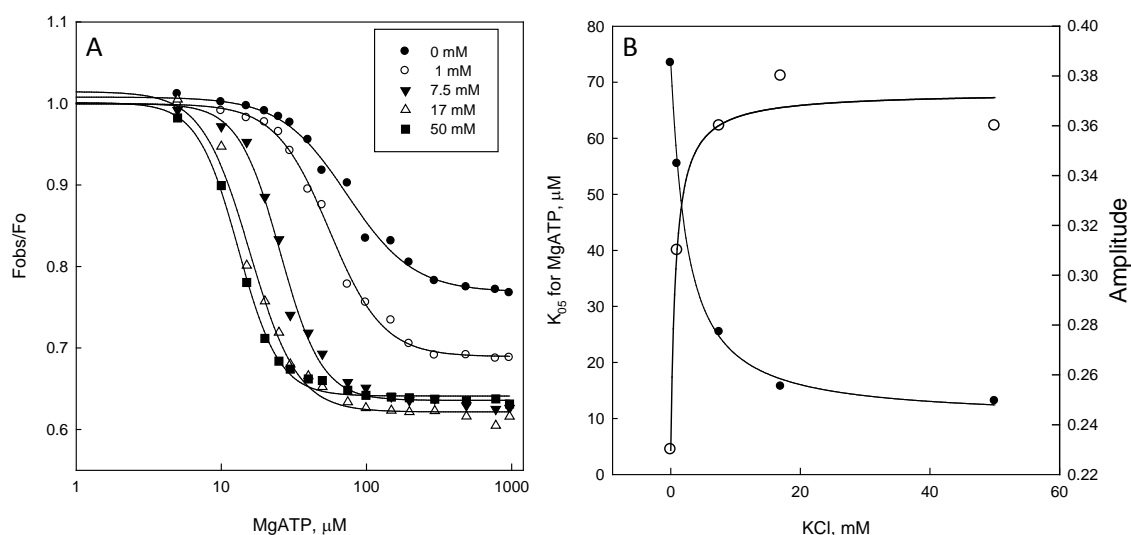

Table 2. Effect of KCl on the binding parameters for MgATP followed by intrinsic fluorescence.

| KCl (mM) | <sup>a</sup> K <sub>0.5</sub> | nH         | Amplitude   |
|----------|-------------------------------|------------|-------------|
| 0        | 73 ± 4.5                      | 1.9 ± 0.2  | 0.33 ± 0.06 |
| 1        | 55 ± 1.7                      | 2.3 ± 0.14 | 0.31 ± 0.04 |
| 7.5      | 25 ± 1                        | 3.0 ± 0.3  | 0.36 ± 0.05 |
| 17       | 15 ± 0.7                      | 2.6 ± 0.25 | 0.38 ± 0.05 |
| 50       | 13 ± 0.29                     | 3.0 ± 0.17 | 0.36 ± 0.02 |

<sup>a</sup>Values in μM. Errors obtained from the fitting procedure.

**Figure S1. A. Effect of KCl on the MgATP binding measured by intrinsic fluorescence.** A. MgATP binding measured using several concentration of KCl (0 mM (●), 1 mM (○), 7.5 mM (▼), 17 mM (△) and 50 mM (■)). Changes in the intrinsic fluorescence are expressed as a fraction of the observed fluorescence (Fobs) for each concentration and the fluorescence intensity at zero MgATP concentration (Fo). The continuous lines correspond to a Hill fit. Table 2 shows the constants for MgATP binding obtained for each concentration of KCl. B. The K<sub>0.5</sub> and amplitudes calculated from the MgATP binding curves are plotted as function of the concentration of KCl. From the variation of the K<sub>0.5</sub> for MgATP an apparent K<sub>d</sub> of 2.6 mM was obtained for potassium binding.

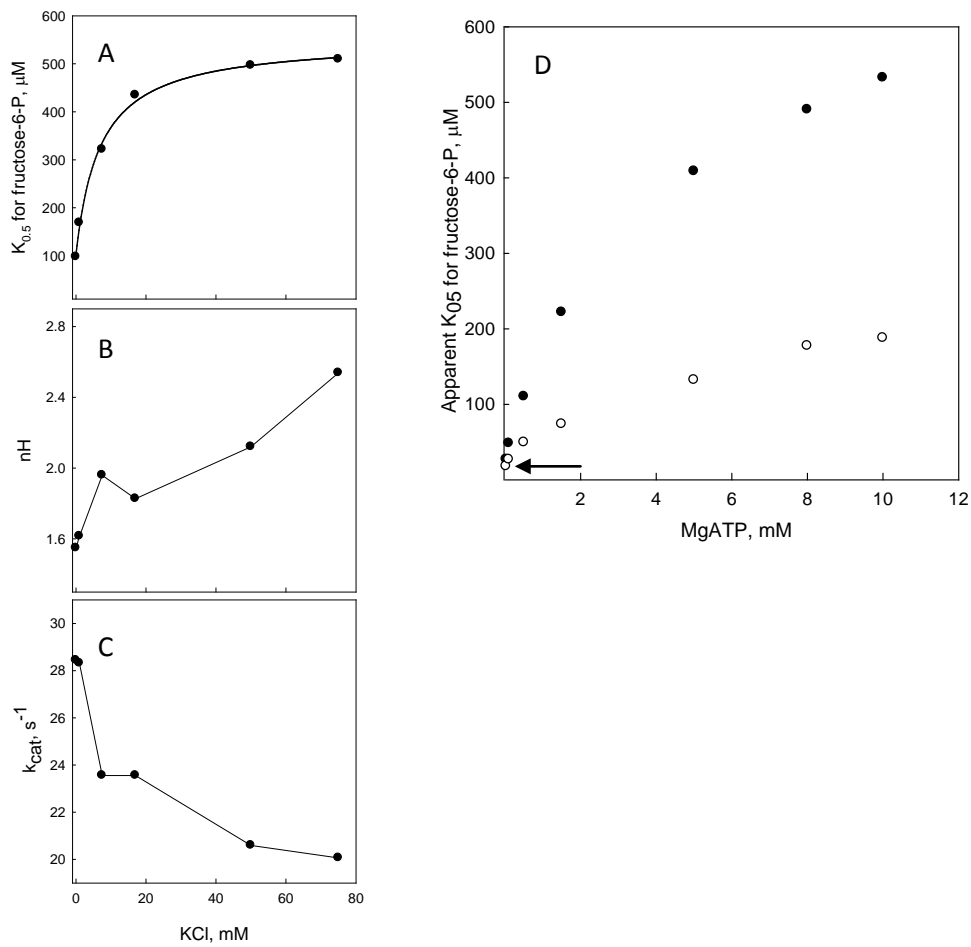

**Figure S2. Effect of KCl on the apparent kinetic parameters for fructose-6-P.** The left panel shows the variation of **A**,  $k_{\text{cat}}$ ; **B**,  $K_{0.5}$ ; **C**, Hill coefficient obtained from the saturation curves for fructose-6-P measured at several KCl concentrations. Measurements were performed at 1 mM MgATP. The constants for each saturation curve were obtained using the Hill equation and plotted against the concentration of KCl. **D**. Variation of  $K_{0.5}$  for fructose-6-P as a function of the MgATP concentration in the absence (○) or presence (●) of 50 mM KCl. The arrow indicates the  $K_d$  value for fructose-6-P obtained in the absence of MgATP using intrinsic fluorescence measurements.

| <b>Table 3.</b> Contact distances calculated for Cs <sup>+</sup> and K <sup>+</sup> . |             |             |             |             |             |             |
|---------------------------------------------------------------------------------------|-------------|-------------|-------------|-------------|-------------|-------------|
|                                                                                       | <b>S250</b> | <b>V252</b> | <b>A286</b> | <b>N289</b> | <b>G291</b> | <b>R293</b> |
| <b>K<sup>+</sup></b>                                                                  | 3.09        | 3.03        | 2.94        | 2.78        | 2.84        | 2.93        |
| <b>Cs<sup>+</sup></b>                                                                 | 3.31        | 2.97        | 2.99        | 2.96        | 3.01        | 3.05        |

Distances (in Å) are given between cesium or potassium and oxygen atoms of the ion-binding site.
